# Supplementary material for: Gender Differences in High-Stakes Performance and College Admission Policies
Source: Atypon-hosted journal article supplement (doi:10.1287/mnsc.2023.02979), 2025-01-30
Supplement: mnsc.2023.02979.sm1.pdf [file mnsc.2023.02979.sm1.pdf]

# Online Appendix: Gender differences in high-stakes performance and college admission policies

Andreu Arenas\*      Caterina Calsamiglia†

August 29, 2024

## Appendix

---

\*University of Barcelona and IEB. [andreu.arenas@ub.edu](mailto:andreu.arenas@ub.edu)

†ICREA-IPEG, CEPR, and IZA. [caterina.calsamiglia@barcelona-ipeg.eu](mailto:caterina.calsamiglia@barcelona-ipeg.eu)

Table A1: Distribution of weights by gender

| Male students |         |        | Female students |         |        |
|---------------|---------|--------|-----------------|---------|--------|
| Weight        | Percent | Cum.   | Weight          | Percent | Cum.   |
| 40/140        | 15.60   | 15.60  | 40/140          | 14.15   | 14.15  |
| 50/140        | 3.55    | 19.15  | 50/140          | 3.70    | 17.85  |
| 60/140        | 23.60   | 42.74  | 60/140          | 25.02   | 42.87  |
| 70/140        | 6.68    | 49.43  | 70/140          | 7.98    | 50.85  |
| 80/140        | 50.57   | 100.00 | 80/140          | 49.15   | 100.00 |
| <b>Total</b>  | 100.00  |        | <b>Total</b>    | 100.00  |        |

Table A2: Heterogeneity in field subjects' weights

|               | (1)                   | (2)                |
|---------------|-----------------------|--------------------|
|               | 1(Taking all exams)   | Average weight     |
| Female        | 0.00631*<br>(0.00343) | 0.0663<br>(0.0514) |
| Year FE       | ✓                     | ✓                  |
| Mean Dep. Var | 0.585                 | 13.69              |
| <i>N</i>      | 84677                 | 84677              |

Sample: post-reform. Robust standard errors in parentheses.

\*  $p < 0.10$ , \*\*  $p < 0.05$ , \*\*\*  $p < 0.01$

Avg. weight =  $\frac{W_B + W_C}{2}$ , with  $or = 0$  if the exam is not taken.

Note: column (1) - OLS regression of an indicator for taking all exams on a female indicator and year FE.  
column (2) - OLS regression of the average weight at admission on a female indicator and year FE.

Table A3: Date of birth effect  
Dependent Variable: Admission Grade

|                 | (1)                   | (2)                   |
|-----------------|-----------------------|-----------------------|
| Born in January | 0.0727***<br>(0.0115) | 0.0724***<br>(0.0115) |
| Year FE         |                       | ✓                     |
| Mean Dep. Var   | -0.00120              | -0.00120              |
| <i>N</i>        | 30255                 | 30255                 |

Sample: born in January or December.

Robust standard errors in parentheses. \*  $p < 0.10$ , \*\*  $p < 0.05$ , \*\*\*  $p < 0.01$

Table A4: Parental education gradient in admission grades

| Dependent Variable: Admission Grade |                       |                       |                       |                       |
|-------------------------------------|-----------------------|-----------------------|-----------------------|-----------------------|
|                                     | (1)                   | (2)                   | (3)                   | (4)                   |
| Both college educated               | 0.461***<br>(0.00557) |                       |                       |                       |
| At least one college educated       |                       | 0.388***<br>(0.00464) |                       |                       |
| Mother college educated             |                       |                       | 0.407***<br>(0.00491) |                       |
| Father college educated             |                       |                       |                       | 0.384***<br>(0.00494) |
| Year FE                             | ✓                     | ✓                     | ✓                     | ✓                     |
| Mean Dep. Var                       | 7.08e-08              | 7.08e-08              | 7.08e-08              | 7.08e-08              |
| Mean Indep. Var                     | 0.233                 | 0.455                 | 0.347                 | 0.341                 |
| <i>N</i>                            | 183451                | 183451                | 183451                | 183451                |

Robust standard errors in parentheses. \*  $p < 0.10$ , \*\*  $p < 0.05$ , \*\*\*  $p < 0.01$

Note: OLS regressions of admission grades on one control at a time and year FE in all cases.

Table A5: Dependent Variable: Admission Grade Rank

|                           | (1)                     | (2)                     | (3)                     | (4)                     |
|---------------------------|-------------------------|-------------------------|-------------------------|-------------------------|
| Female $\times$ Post 2009 | -0.0205***<br>(0.00275) | -0.0222***<br>(0.00547) | -0.0229***<br>(0.00251) | -0.0192***<br>(0.00497) |
| Female                    | 0.0430***<br>(0.00187)  |                         | 0.0328***<br>(0.00173)  |                         |
| Female                    | ✓                       | ✓                       | ✓                       | ✓                       |
| Year FE                   | ✓                       | ✓                       | ✓                       | ✓                       |
| Gender-specific trends    |                         | ✓                       |                         | ✓                       |
| Controls                  |                         |                         | ✓                       | ✓                       |
| Mean Dep. Var             | 0.499                   | 0.499                   | 0.499                   | 0.499                   |
| <i>N</i>                  | 183451                  | 183451                  | 182259                  | 182259                  |

Robust standard errors in parentheses. \*  $p < 0.10$ , \*\*  $p < 0.05$ , \*\*\*  $p < 0.01$

Rank is equal to one for the highest score within a cohort and zero for the lowest.

Controls: Mother and father education and occupation, year and month of birth, nationality, high school, postal code.

Table A6: Robustness Admission Grades

|                               | (1)                     | (2)                     | (3)                     | (4)                     |
|-------------------------------|-------------------------|-------------------------|-------------------------|-------------------------|
| Female $\times$ Post 2009     | -0.0506***<br>(0.00952) | -0.0608***<br>(0.00872) | -0.0661***<br>(0.00761) | -0.0533***<br>(0.00712) |
| Female                        | 0.142***<br>(0.00645)   | 0.109***<br>(0.00600)   | 0.142***<br>(0.00645)   | 0.108***<br>(0.00596)   |
| Female                        | ✓                       | ✓                       | ✓                       | ✓                       |
| Year FE                       | ✓                       | ✓                       | ✓                       | ✓                       |
| Post $\times$ Subject weights |                         |                         | ✓                       | ✓                       |
| Controls                      |                         | ✓                       |                         | ✓                       |
| Mean Dep. Var                 | -1.57e-08               | -0.00244                | 7.08e-08                | -0.00240                |
| Subject weights               | 19                      | 19                      | Baseline<br>(enrolment) | Baseline<br>(enrolment) |
| $N$                           | 183451                  | 182259                  | 183451                  | 182259                  |

Robust standard errors in parentheses. \*  $p < 0.10$ , \*\*  $p < 0.05$ , \*\*\*  $p < 0.01$ .

Controls: Mother and father education and occupation, year and month of birth, nationality, high school, postal code.

Table A7: Re-weighting effects of the reform

|                           | Admission Grade        |                        | $\Delta$ Admission Grade<br>Admission Grade,<br>based on pre-treatment formula |                         |
|---------------------------|------------------------|------------------------|--------------------------------------------------------------------------------|-------------------------|
|                           | (1)                    | (2)                    | (3)                                                                            | (4)                     |
| Female $\times$ Post 2009 | -0.0641***<br>(0.0165) | -0.0621***<br>(0.0152) | -0.0475***<br>(0.00256)                                                        | -0.0452***<br>(0.00254) |
| Female                    | 0.141***<br>(0.0106)   | 0.114***<br>(0.00985)  |                                                                                |                         |
| Year FE                   | ✓                      | ✓                      | ✓                                                                              | ✓                       |
| Controls                  |                        | ✓                      |                                                                                | ✓                       |
| Mean Dep. Var             | -0.000151              | -0.0000259             | -0.000338                                                                      | -0.000303               |
| $N$                       | 70228                  | 70067                  | 70228                                                                          | 70067                   |

Robust standard errors in parentheses. \*  $p < 0.10$ , \*\*  $p < 0.05$ , \*\*\*  $p < 0.01$ .

Sample: public schools, weighted to match admission scores by gender/year in the population via entropy balancing. Pre-treatment formula: pre-treatment weights for high school vs. high stakes and for core vs. field subjects within the high stakes GPA.

Controls: Mother and father education and occupation, year and month of birth, nationality, high school, postal code.

Table A8: Re-weighting effects of the reform, public schools, unweighted.

|                           | Admission Grade       |                        | $\Delta$ Admission Grade<br>Admission Grade,<br>based on pre-treatment formula |                         |
|---------------------------|-----------------------|------------------------|--------------------------------------------------------------------------------|-------------------------|
|                           | (1)                   | (2)                    | (3)                                                                            | (4)                     |
| Female $\times$ Post 2009 | -0.0354**<br>(0.0149) | -0.0389***<br>(0.0140) | -0.0482***<br>(0.00264)                                                        | -0.0458***<br>(0.00261) |
| Female                    | 0.103***<br>(0.00978) | 0.0839***<br>(0.00916) |                                                                                |                         |
| Year FE                   | ✓                     | ✓                      | ✓                                                                              | ✓                       |
| Controls                  |                       | ✓                      |                                                                                | ✓                       |
| Mean Dep. Var             | -0.139                | -0.138                 | -0.000646                                                                      | -0.000609               |
| $N$                       | 70228                 | 70067                  | 70228                                                                          | 70067                   |

Robust standard errors in parentheses. \*  $p < 0.10$ , \*\*  $p < 0.05$ , \*\*\*  $p < 0.01$ .

Sample: public schools. Pre-treatment formula: pre-treatment weights for high school vs. high stakes and for core vs. field subjects within the high stakes GPA.

Controls: Mother and father education and occupation, year and month of birth, nationality, high school, postal code.

Table A9: Effect of the reform along the performance distribution  
Dependent Variable: Admission Grade

|                           | (1)                  | (2)                  | (3)                   | (4)                   |
|---------------------------|----------------------|----------------------|-----------------------|-----------------------|
| Female $\times$ Post 2009 | -0.00625<br>(0.0172) | -0.0321*<br>(0.0179) | -0.120***<br>(0.0186) | -0.109***<br>(0.0191) |
| Female                    | ✓                    | ✓                    | ✓                     | ✓                     |
| Year FE                   | ✓                    | ✓                    | ✓                     | ✓                     |
| Sample                    | Predicted 1-25%      | Predicted 25-50%     | Predicted 50-75%      | Predicted 75-100%     |
| Mean Dep. Var             | -0.383               | -0.154               | 0.0720                | 0.466                 |
| $N$                       | 45863                | 45863                | 45863                 | 45862                 |

Robust standard errors in parentheses. \*  $p < 0.10$ , \*\*  $p < 0.05$ , \*\*\*  $p < 0.01$

Table A10: Within faculty-field-municipality autocorrelation in outcomes

|                           | (1)                  | (2)                   | (3)                   |
|---------------------------|----------------------|-----------------------|-----------------------|
|                           | Thresh. Grade        | #Enrolled Students    | %Female Enrolled      |
| Lagged T.Grade            | 0.949***<br>(0.0167) |                       |                       |
| Lagged #Enrolled Students |                      | 0.987***<br>(0.00750) |                       |
| Lagged %Female Enrolled   |                      |                       | 0.951***<br>(0.00840) |
| Mean Dep. Var             | -0.873               | 341.6                 | 0.584                 |
| $N$                       | 874                  | 874                   | 874                   |

Standard errors clustered by the panel unit faculty-field-municipality.

\*  $p < 0.10$ , \*\*  $p < 0.05$ , \*\*\*  $p < 0.01$

Estimates weighted by the number of enrolled students.

Note: OLS regressions of the dependent variable on its lagged value.

Table A11: Threshold grades, program of enrollment

|                           | Thresh G. (pre-treat).  |                        | Thresh G. (actual).     |                       |
|---------------------------|-------------------------|------------------------|-------------------------|-----------------------|
|                           | (1)                     | (2)                    | (3)                     | (4)                   |
| Female                    | 0.168***<br>(0.00498)   |                        | 0.168***<br>(0.00498)   |                       |
| Female $\times$ Post 2009 | -0.0262***<br>(0.00769) | -0.0537***<br>(0.0155) | -0.0720***<br>(0.00795) | -0.107***<br>(0.0158) |
| Year FE                   | ✓                       | ✓                      | ✓                       | ✓                     |
| Gender-specific trends    |                         | ✓                      |                         | ✓                     |
| Mean Dep. Var             | -0.833                  | -0.833                 | -0.872                  | -0.872                |
| <i>N</i>                  | 166372                  | 166372                 | 170082                  | 170082                |

Robust standard errors in parentheses. \*  $p < 0.10$ , \*\*  $p < 0.05$ , \*\*\*  $p < 0.01$

Thresh G. (pre-treat): based on pre-reform avg. values by faculty-field-municipality.

Thresh G. (actual): based on pre and post-reform averages by faculty-field-municipality.

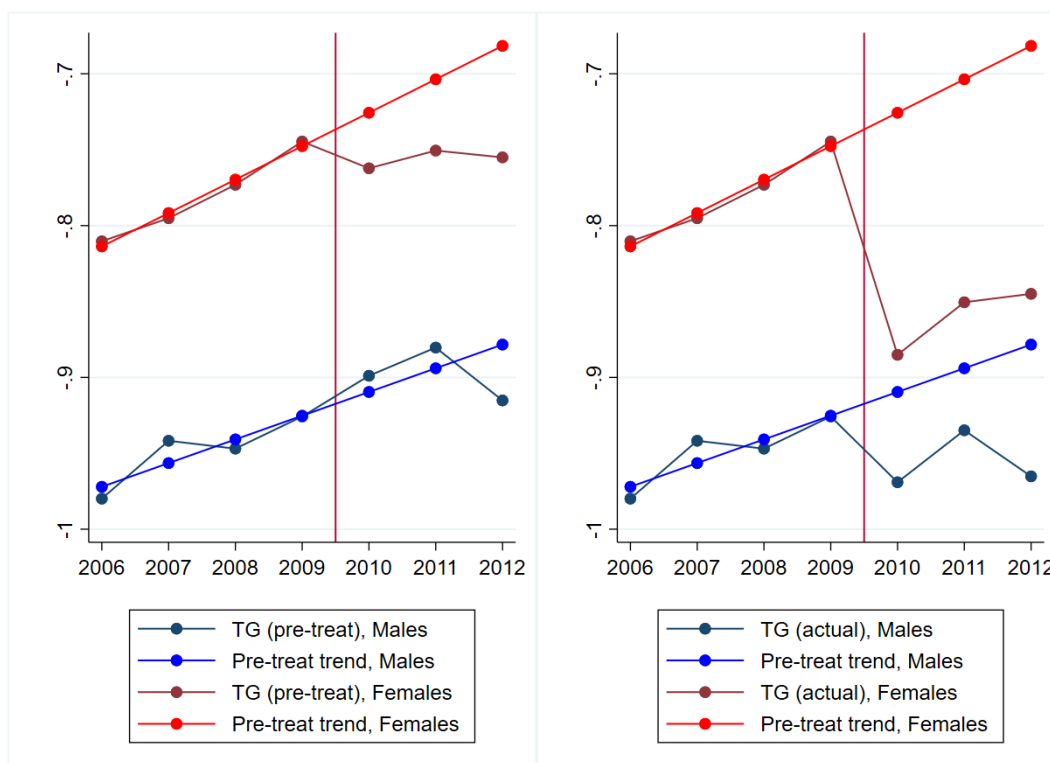

Table A12: Allocation change across vs. within-field

|                           | TG(pre-treat)           | TG(pre-treat field avg.) | TG(pre-treat) -<br>TG(pre-treat field avg.) |
|---------------------------|-------------------------|--------------------------|---------------------------------------------|
|                           | (1)                     | (2)                      | (3)                                         |
| Female                    | 0.168***<br>(0.00498)   | 0.0535***<br>(0.00173)   | 0.115***<br>(0.00467)                       |
| Female $\times$ Post 2009 | -0.0262***<br>(0.00769) | -0.00223<br>(0.00270)    | -0.0220***<br>(0.00715)                     |
| Year FE                   | ✓                       | ✓                        | ✓                                           |
| Mean Dep. Var             | -0.833                  | -0.841                   | 0.00763                                     |
| $N$                       | 166372                  | 169955                   | 166372                                      |

Robust standard errors in parentheses. \*  $p < 0.10$ , \*\*  $p < 0.05$ , \*\*\*  $p < 0.01$

TG(pre-treat): threshold grade of enrolment, based on pre-reform avg. values by faculty-field-municipality.

TG(pre-treat field avg.): average by field of study.

Table A13: Date of birth effect

| Dependent variable: threshold grade |                       |                       |
|-------------------------------------|-----------------------|-----------------------|
|                                     | (1)                   | (2)                   |
| Born in January                     | 0.0585***<br>(0.0112) | 0.0591***<br>(0.0112) |
| Year FE                             |                       | ✓                     |
| Mean Dep. Var                       | -0.870                | -0.870                |
| $N$                                 | 28063                 | 28063                 |

Sample: born in January or December.

Robust standard errors in parentheses. \*  $p < 0.10$ , \*\*  $p < 0.05$ , \*\*\*  $p < 0.01$

Table A14: Parental education gradient in threshold grades

| Dependent variable: threshold grade |                       |                       |                       |                       |
|-------------------------------------|-----------------------|-----------------------|-----------------------|-----------------------|
|                                     | (1)                   | (2)                   | (3)                   | (4)                   |
| Both college educated               | 0.390***<br>(0.00584) |                       |                       |                       |
| At least one college educated       |                       | 0.318***<br>(0.00457) |                       |                       |
| Mother college educated             |                       |                       | 0.330***<br>(0.00496) |                       |
| Father college educated             |                       |                       |                       | 0.328***<br>(0.00499) |
| Year FE                             | ✓                     | ✓                     | ✓                     | ✓                     |
| Mean Dep. Var                       | -0.872                | -0.872                | -0.872                | -0.872                |
| Mean Indep. Var                     | 0.230                 | 0.452                 | 0.344                 | 0.337                 |
| $N$                                 | 170082                | 170082                | 170082                | 170082                |

Robust standard errors in parentheses. \*  $p < 0.10$ , \*\*  $p < 0.05$ , \*\*\*  $p < 0.01$

Note: OLS regressions of threshold grades on one control at a time and year FE in all cases.

Table A15: College performance and expected gains from the reform

| College performance<br>(passed/enrolled credits)                                                        |                         |
|---------------------------------------------------------------------------------------------------------|-------------------------|
| (1)                                                                                                     |                         |
| Female, $\widehat{\beta}(X) > 0$                                                                        | 0.0594***<br>(0.0122)   |
| Male, $\widehat{\beta}(X) < 0$                                                                          | -0.115***<br>(0.0190)   |
| Male, $\widehat{\beta}(X) > 0$                                                                          | -0.0534***<br>(0.0127)  |
| Intercept (Female, $\widehat{\beta}(X) < 0$ )                                                           | 0.00589<br>(0.00839)    |
| Mean Dep. Var                                                                                           | -3.07e-11               |
| $N$                                                                                                     | 39159                   |
| Robust standard errors in parentheses. * $p < 0.10$ , ** $p < 0.05$ , *** $p < 0.01$ . Weighted sample. |                         |
| College performance<br>(passed/enrolled credits)                                                        |                         |
| (1)                                                                                                     |                         |
| $\widehat{\beta}(X)$                                                                                    | 0.244***<br>(0.0587)    |
| Female                                                                                                  | 0.116***<br>(0.0109)    |
| Female $\times$ $\widehat{\beta}(X)$                                                                    | 0.0711<br>(0.0691)      |
| Intercept                                                                                               | -0.0754***<br>(0.00900) |
| Mean Dep. Var                                                                                           | -3.07e-11               |
| $N$                                                                                                     | 39159                   |
| Robust standard errors in parentheses. * $p < 0.10$ , ** $p < 0.05$ , *** $p < 0.01$ . Weighted sample. |                         |

Table A16: Predicted effect of the reform and pre-reform admission grades

|                                 | $\widehat{\beta}(X)$     |
|---------------------------------|--------------------------|
|                                 | (1)                      |
| Admission Grade                 | -0.0121***<br>(0.000952) |
| Female                          | -0.0736***<br>(0.00121)  |
| Female $\times$ Admission Grade | -0.0194***<br>(0.00132)  |
| Intercept                       | 0.0446***<br>(0.000868)  |
| Mean Dep. Var                   | -3.60e-08                |
| $N$                             | 98774                    |

Robust standard errors in parentheses. \*  $p < 0.10$ , \*\*  $p < 0.05$ , \*\*\*  $p < 0.01$ . Pre-reform sample.

Table A17: College performance potential and expected gains from the reform, OLS prediction of  $\widehat{\beta}(X)$

|                                               | College performance<br>(passed/enrolled credits) |
|-----------------------------------------------|--------------------------------------------------|
|                                               | (1)                                              |
| Female, $\widehat{\beta}(X) > 0$              | 0.0696***<br>(0.0121)                            |
| Male, $\widehat{\beta}(X) < 0$                | -0.0832***<br>(0.0162)                           |
| Male, $\widehat{\beta}(X) > 0$                | -0.0488***<br>(0.0136)                           |
| Intercept (Female, $\widehat{\beta}(X) < 0$ ) | -0.000585<br>(0.00862)                           |
| Mean Dep. Var                                 | -3.07e-11                                        |
| $N$                                           | 39159                                            |

Robust standard errors in parentheses. \*  $p < 0.10$ , \*\*  $p < 0.05$ , \*\*\*  $p < 0.01$ . Weighted sample.

Figure A1: Effect of the reform on admission grades by gender

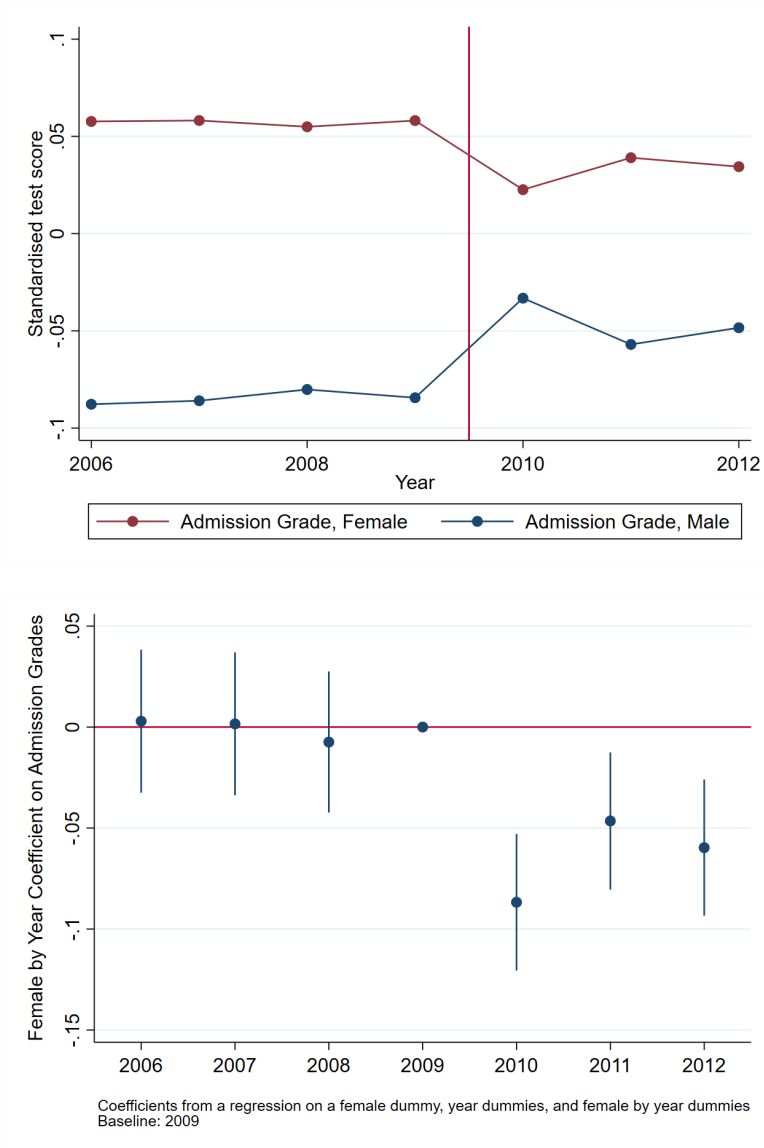

Figure A2

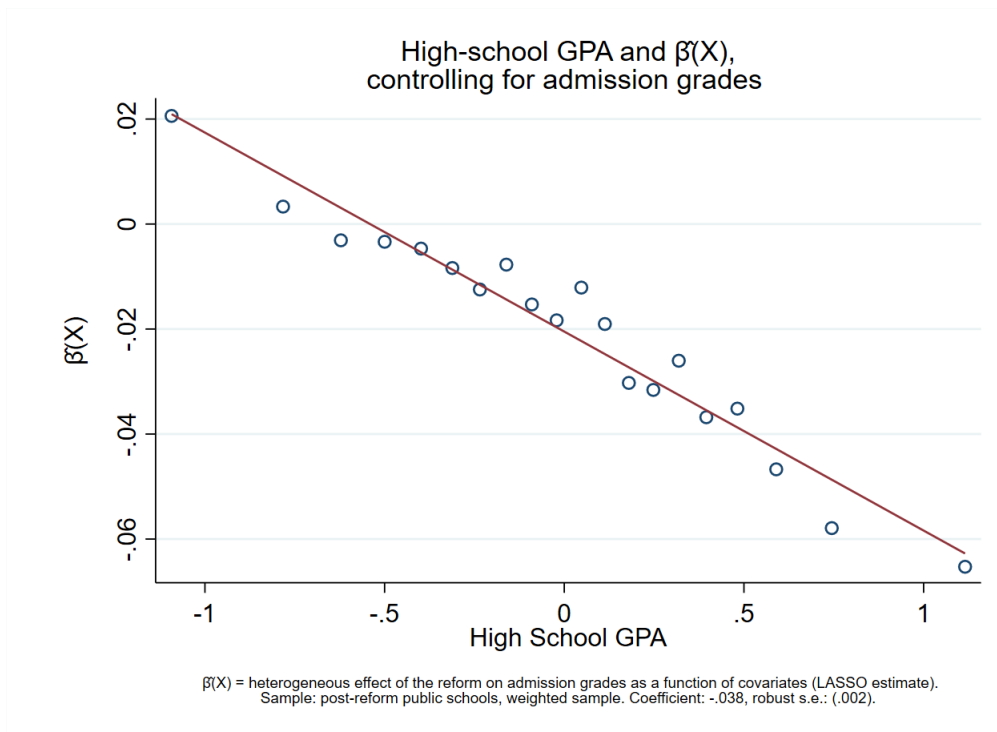

Figure A3: College performance and expected gains from the reform

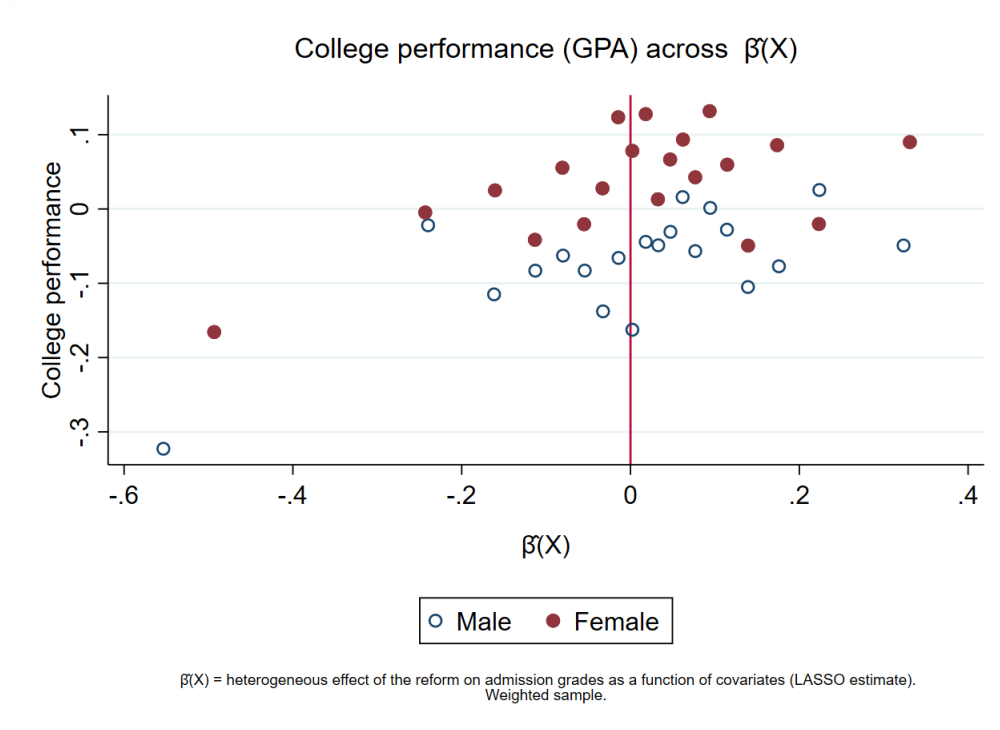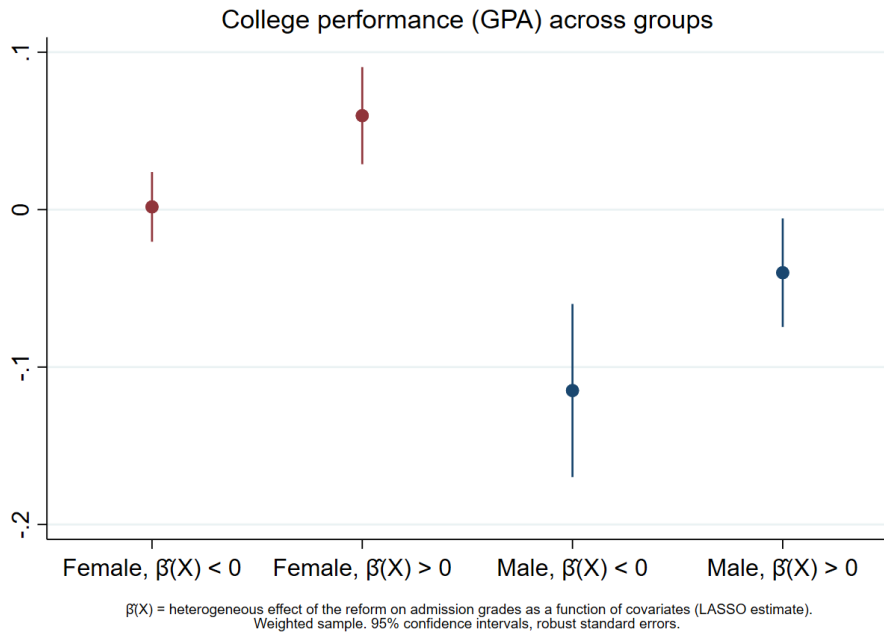

Figure A4: College performance and expected gains from the reform (unweighted)

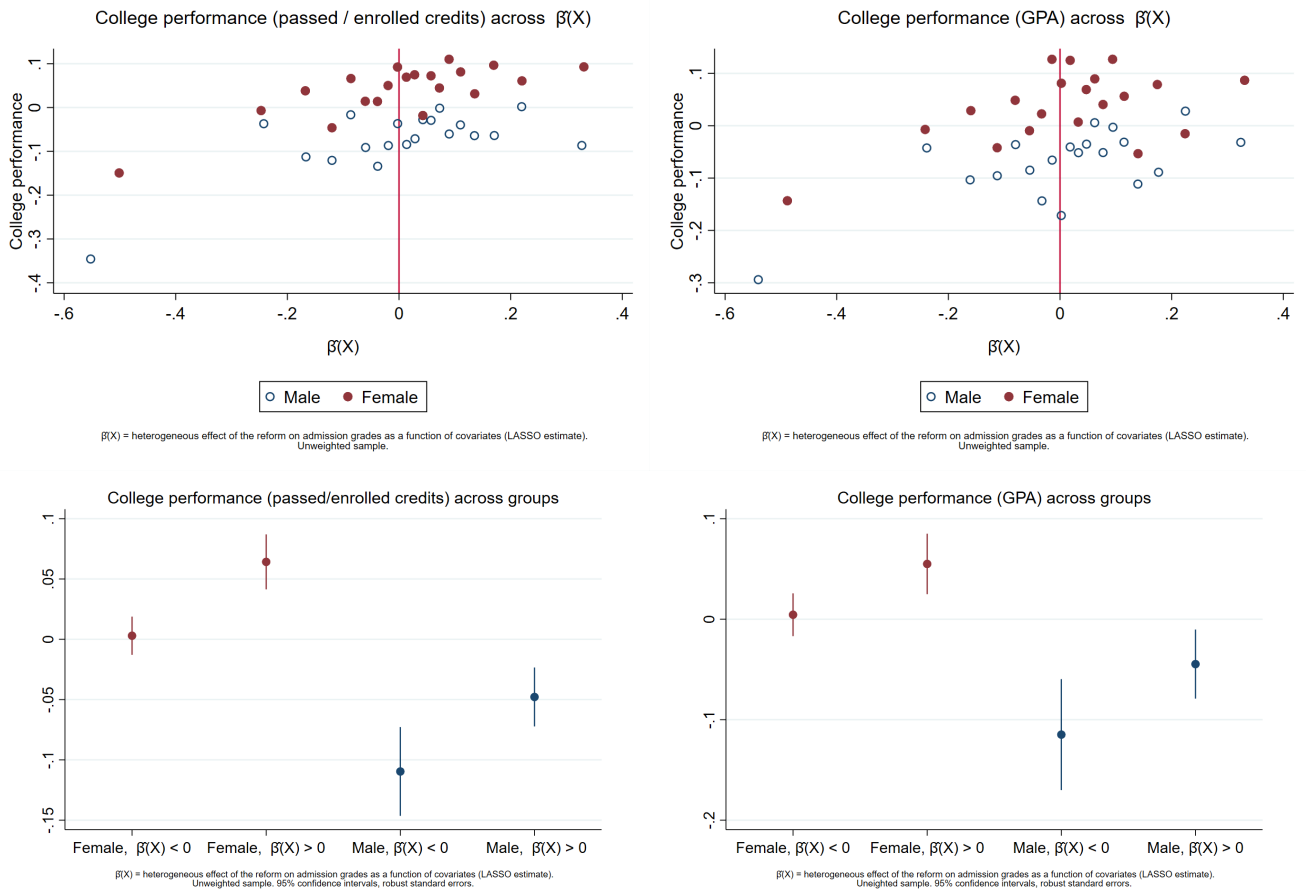

Figure A5: College performance and expected gains from the reform across fields

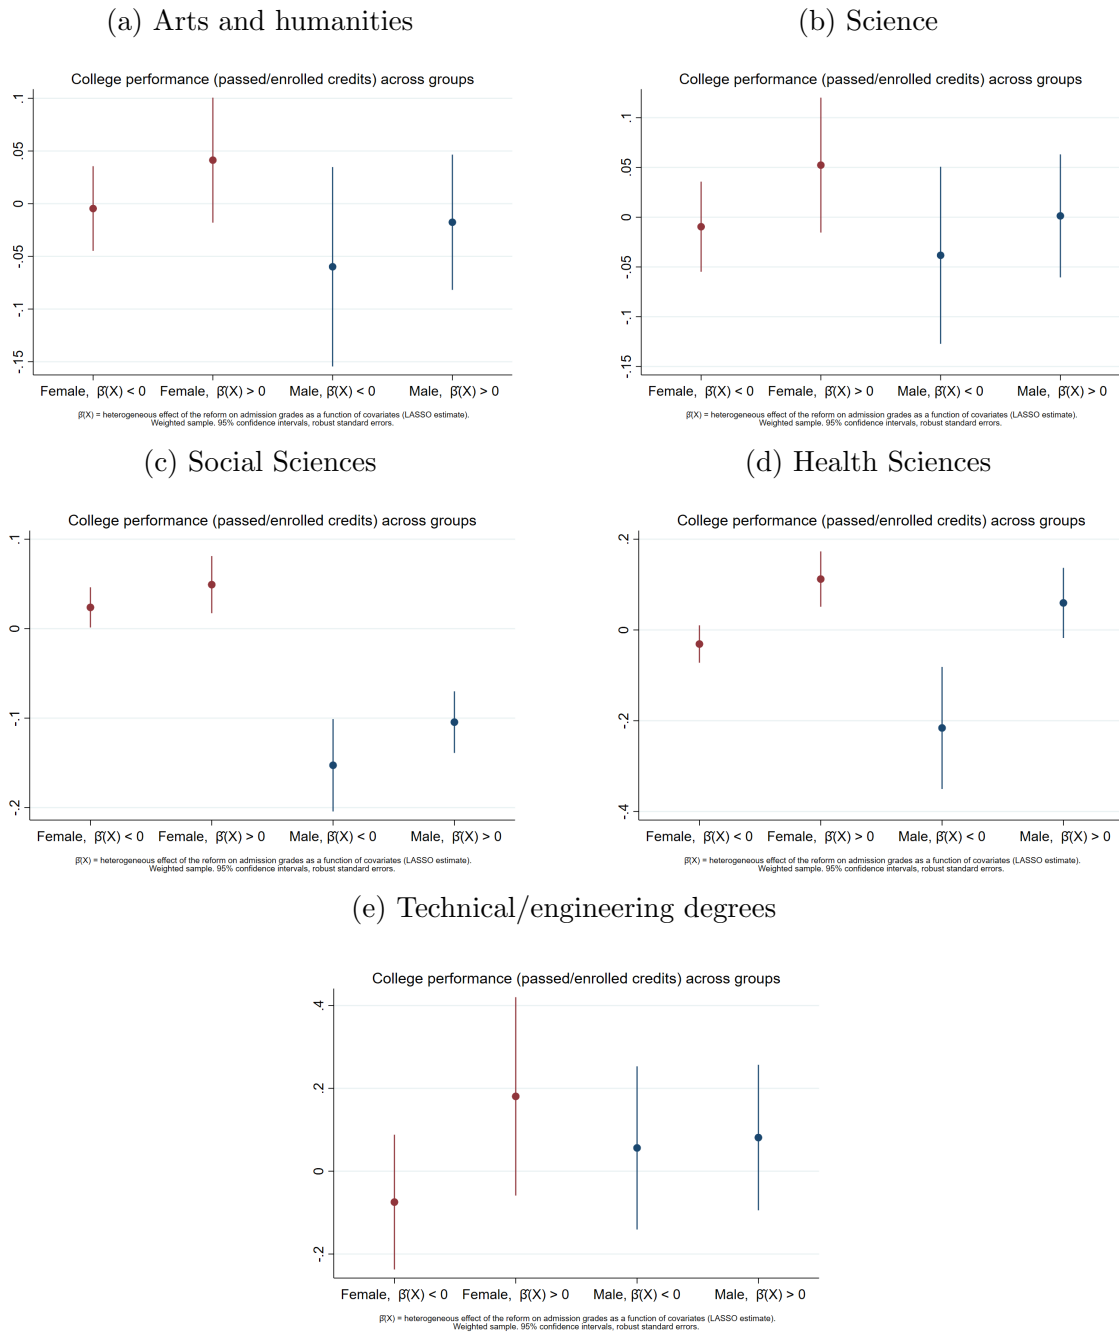

## Appendix B: Career Prospects

In this Appendix, we study how the change in students' allocation changes students' career prospects. To this aim, we use survey data on a sample of pre-treatment college graduates from Catalan universities with information on labor market outcomes four years after graduation. For every student, we do not observe the exact academic program, but area (i.e., field of study) indicators and the university. There are enough area indicators (more than 50), which combined with the university of enrollment make it a meaningful measure, despite some measurement error. Figure A6 displays the social science classification to illustrate the level of detail of the field of study that we observe.<sup>1</sup>

Figure A6: Degree classification example: social science

**Catàleg de titulacions**

| CODI    | ENSENYAMENT                                 | SUBÀMBIT DETALLAT (1r NIVELL) |                            | SUBÀMBIT AMPLIAT (2n NIVELL) |                             | ÀMBIT                           |
|---------|---------------------------------------------|-------------------------------|----------------------------|------------------------------|-----------------------------|---------------------------------|
| 2010101 | Economia                                    | 20101                         | Economia                   | 201                          | Economia, Empresa i Turisme | 2 Ciències socials i jurídiques |
| 2010102 | Comptabilitat i finances                    | 20101                         | Economia                   |                              |                             |                                 |
| 2010201 | Administració i direcció d'empreses         | 20102                         | Administració d'Empreses   |                              |                             |                                 |
| 2010202 | Màrqueting i investigació de mercats        |                               |                            |                              |                             |                                 |
| 2010203 | Ciències empresarials                       |                               |                            |                              |                             |                                 |
| 2010204 | Estudis internacionals d'economia i empresa |                               |                            |                              |                             |                                 |
| 2010301 | Turisme                                     | 20103                         | Turisme                    |                              |                             |                                 |
| 2020101 | Dret                                        | 20201                         | Dret                       | 202                          | Dret, laboral i polítiques  |                                 |
| 2020201 | Criminologia                                | 20202                         | Laboral                    |                              |                             |                                 |
| 2020202 | Relacions laborals                          |                               |                            |                              |                             |                                 |
| 2020203 | Ciències del treball                        |                               |                            |                              |                             |                                 |
| 2020204 | Prevençió i seguretat integral              | 20203                         | Polítiques                 |                              |                             |                                 |
| 2020301 | Gestió i administració pública              |                               |                            |                              |                             |                                 |
| 2020302 | Ciències polítiques i de l'administració    |                               |                            |                              |                             |                                 |
| 2020401 | Sociologia                                  | 20204                         | Sociologia, Geografia      |                              |                             |                                 |
| 2020402 | Antropologia social i cultural              |                               |                            |                              |                             |                                 |
| 2020403 | Geografia                                   |                               |                            |                              |                             |                                 |
| 2030101 | Comunicació audiovisual                     | 20301                         | Comunicació                | 203                          | Comunicació i Documentació  |                                 |
| 2030102 | Periodisme                                  |                               |                            |                              |                             |                                 |
| 2030103 | Publicitat i relacions públiques            |                               |                            |                              |                             |                                 |
| 2030201 | Informació i documentació                   | 20302                         | Documentació               |                              |                             |                                 |
| 2040101 | Educació infantil                           | 20401                         | Mestres                    | 204                          | Educació                    |                                 |
| 2040102 | Educació primària                           |                               |                            |                              |                             |                                 |
| 2040103 | Mestre. Especialitat d'Educació Especial    |                               |                            |                              |                             |                                 |
| 2040104 | Mestre. Especialitat d'Educació Física      |                               |                            |                              |                             |                                 |
| 2040105 | Mestre. Especialitat d'Educació Musical     |                               |                            |                              |                             |                                 |
| 2040106 | Mestre. Especialitat de Llengua Estrangera  |                               |                            |                              |                             |                                 |
| 2040201 | Pedagogia                                   | 20402                         | Pedagogia i Psicopedagogia |                              |                             |                                 |
| 2040202 | Psicopedagogia                              |                               |                            |                              |                             |                                 |
| 2040203 | Formació de professorat                     |                               |                            |                              |                             |                                 |
| 2050101 | Treball social                              | 20501                         | Treball i educació social  | 205                          | Intervenció Social          |                                 |
| 2050102 | Educació social                             |                               |                            |                              |                             |                                 |
| 2050201 | Psicologia social i organitzacional         |                               |                            |                              |                             |                                 |
| 2050201 | Psicologia social i organitzacional         | 20502                         | Psicologia                 |                              |                             |                                 |
| 2100101 | Titulacions Mixtes                          | 21001                         | Titulacions Mixtes         | 210                          | Titulacions Mixtes          |                                 |

<sup>1</sup>We do not observe academic programs (columns 1 and 2), but sub-sub-area indicators (columns 3 and 4).

In this representative survey, although girls outperform boys in educational attainment, females earn 23% less than males on average (9.3% less when accounting for field of study), as reported by Table A18.<sup>2</sup>

Table A18: Gender wage gap of college graduates

| Dependent variable: ln(wage)    |                        |                         |                         |
|---------------------------------|------------------------|-------------------------|-------------------------|
|                                 | (1)                    | (2)                     | (3)                     |
| Female                          | -0.232***<br>(0.00915) | -0.0923***<br>(0.00930) | -0.0939***<br>(0.00930) |
| Cohort FE                       | ✓                      | ✓                       | ✓                       |
| Field of study FE               |                        | ✓                       | ✓                       |
| University-by-field of study FE |                        |                         | ✓                       |
| Mean Dep. Var                   | 9.662                  | 9.662                   | 9.662                   |
| <i>N</i>                        | 11729                  | 11729                   | 11724                   |

Field of study: sub-sub-area.

Sample of 2006-2009 cohorts, 4 years after graduation.

All regressions control for year of survey FE

Robust standard errors in parentheses. \*  $p < 0.10$ , \*\*  $p < 0.05$ , \*\*\*  $p < 0.01$

The left panel of Figure A7 shows that there is almost no unconditional correlation between college selectivity and earnings. However, the right panel shows that a positive correlation exists within field of study. This is because selectivity is determined by capacity constraints and demand, and some high-paying technical degrees have good career prospects but low capacity constraints and low demand, while some degrees in the humanities have worse career prospects but high capacity constraints and demand. However, within field of study, where demand and capacity constraints are more homogeneous, the correlation is positive, as one would expect.

Figure A8 displays wages against the gender composition of academic programs. First, it shows that within academic programs, females earn lower wages. Second, it also shows that programs with a higher percentage of female students tend to pay less (for both males and females). This is important because the right panel of Figure A8 shows that due to the reform, females enroll less in programs with a higher pre-reform percentage of female

<sup>2</sup>We use the 2014 and 2017 waves of the survey, conducted by the Catalan Agency for the Quality of Universities (AQU), which include students from the 2006-2009 enrolling cohorts.

students.

Figure A7: Threshold grades and wages

Unconditionally

Within field

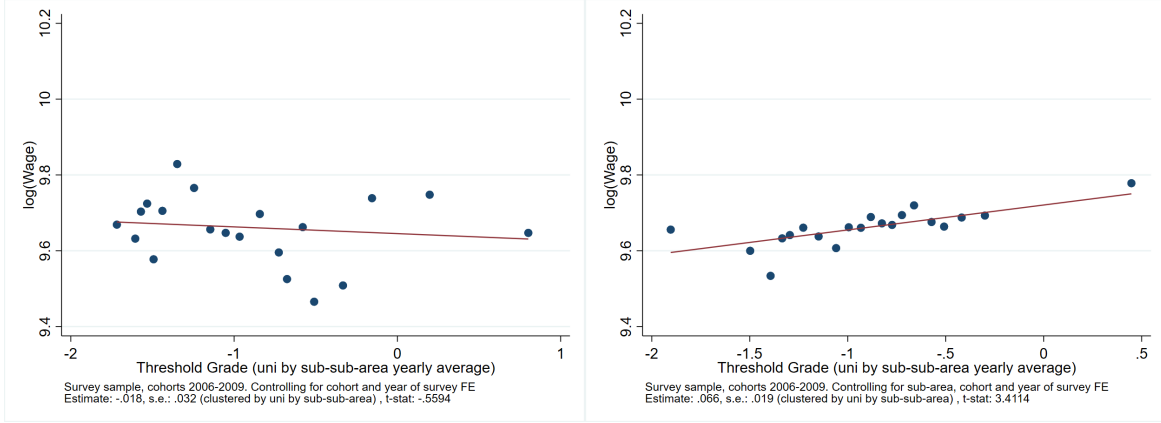

Figure A8

% of female students  
and wages

% female enrollment  
by pre-treatment female enrollment

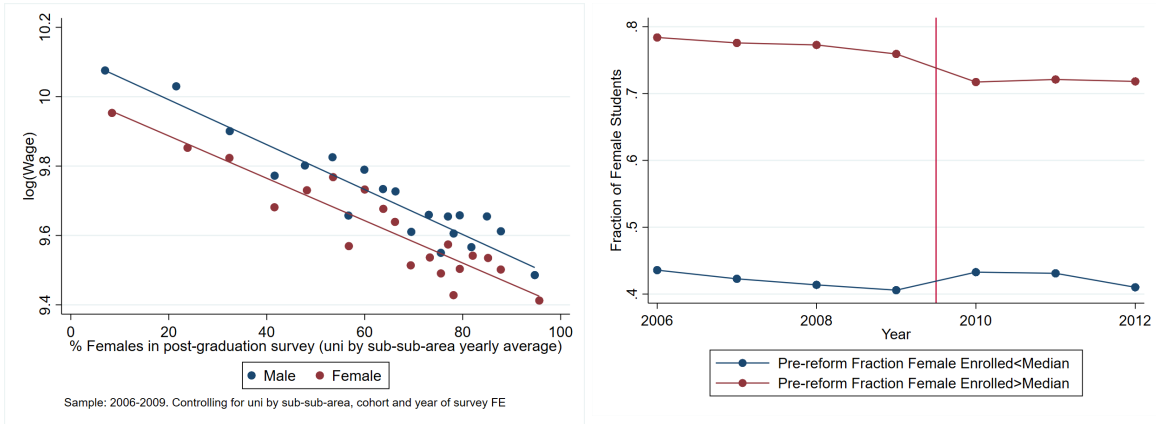

Hence, given these patterns of earnings across academic programs, the effect of the reform on career prospects by gender is not straightforward. To estimate it, we first estimate expected labor market outcomes by academic program using the survey data, which includes cohorts enrolling in college between 2006 and 2009 (i.e., pre-reform cohorts):

$$Outcome_{it} = \delta Female_i + \alpha (Area \times Uni)_i + \beta Trend_t + \gamma Trend_t \times (Area \times Uni)_i + \epsilon_{it}$$

Where labor market outcomes of student  $i$  in enrolling cohort  $t$  are measured for the 2006-2009 enrolling cohorts (and survey FE have been partialled out), and where  $Area \times Uni$  are dummies for study subarea (or sub-sub-area) by university.

In a second step, we combine the predicted labor market outcomes from the previous regression with the college enrollment data from the Selectivitat dataset, and we estimate:

$$\widehat{Outcome}_{it} = \delta_t + \gamma Female_i + \beta Female_i \times Post_t + \epsilon_{it}$$

Table A19 reports point estimates, indicating an increase of around 2.5pp in the gap on top of a 9.3pp pre-reform gap within field of study (and an unconditional 23pp pre-reform gap). Table A20 reports point estimates on the expected employment rate. Given the high employment rate among Catalan university graduates (around 87% according to the survey), the magnitude of the effect is smaller but still significant. To benchmark the magnitude of these effects, it is interesting to compare them with the findings in ? that pollution in matriculation exam days leads to lower test scores, resulting in a decline in post-secondary education and earnings. It turns out that the effect on female test scores and career prospects is similar in magnitude to the effect of one standard deviation in pollution exposure on the day of the exam. Tables A21 and A22 report placebo tests showing that the change in the post-treatment period is large and significant compared to any changes within the pre-treatment period.

Table A19: Dependent Variable: Predicted log(wage)

|                    | (1)                     | (2)                            | (3)                     | (4)                                |
|--------------------|-------------------------|--------------------------------|-------------------------|------------------------------------|
| Female             | -0.229***<br>(0.00167)  | -0.224***<br>(0.00172)         | -0.244***<br>(0.00195)  | -0.229***<br>(0.00203)             |
| Female × Post 2009 | -0.0212***<br>(0.00276) | -0.0140***<br>(0.00282)        | -0.0361***<br>(0.00341) | -0.0274***<br>(0.00354)            |
| Year FE            | ✓                       | ✓                              | ✓                       | ✓                                  |
| Main Predictor     | Sub-field<br>× Uni      | Sub-field<br>× Uni<br>× Female | Sub-sub-field<br>× Uni  | Sub-sub-field<br>× Uni<br>× Female |
| Mean Dep. Var      | 9.684                   | 9.688                          | 9.661                   | 9.665                              |
| <i>N</i>           | 170082                  | 170082                         | 170082                  | 170082                             |

Robust standard errors in parentheses. \*  $p < 0.10$ , \*\*  $p < 0.05$ , \*\*\*  $p < 0.01$

Table A20: Dependent Variable: Predicted Employment Rate

|                    | (1)                      | (2)                            | (3)                      | (4)                                |
|--------------------|--------------------------|--------------------------------|--------------------------|------------------------------------|
| Female             | -0.0109***<br>(0.000515) | -0.00983***<br>(0.000600)      | -0.0148***<br>(0.000695) | -0.0134***<br>(0.000787)           |
| Female × Post 2009 | -0.00340***<br>(0.00104) | -0.00110<br>(0.00110)          | -0.00868***<br>(0.00169) | -0.00551***<br>(0.00174)           |
| Year FE            | ✓                        | ✓                              | ✓                        | ✓                                  |
| Main Predictor     | Sub-field<br>× Uni       | Sub-field<br>× Uni<br>× Female | Sub-sub-field<br>× Uni   | Sub-sub-field<br>× Uni<br>× Female |
| Mean Dep. Var      | 0.873                    | 0.872                          | 0.874                    | 0.872                              |
| <i>N</i>           | 170082                   | 170082                         | 170082                   | 170082                             |

Robust standard errors in parentheses. \*  $p < 0.10$ , \*\*  $p < 0.05$ , \*\*\*  $p < 0.01$

Table A21: Dependent Variable: Predicted log(wage)

|                           | (1)                       | (2)                                          | (3)                           | (4)                                              |
|---------------------------|---------------------------|----------------------------------------------|-------------------------------|--------------------------------------------------|
| Female                    | -0.228***<br>(0.00241)    | -0.224***<br>(0.00249)                       | -0.243***<br>(0.00276)        | -0.229***<br>(0.00288)                           |
| Female $\times$ Post 2009 | -0.0203***<br>(0.00319)   | -0.0142***<br>(0.00326)                      | -0.0353***<br>(0.00392)       | -0.0276***<br>(0.00407)                          |
| Female $\times$ Post 2007 | -0.00181<br>(0.00334)     | 0.000519<br>(0.00344)                        | -0.00152<br>(0.00390)         | 0.000392<br>(0.00406)                            |
| Year FE                   | ✓                         | ✓                                            | ✓                             | ✓                                                |
| Main Predictor            | Sub-field<br>$\times$ Uni | Sub-field<br>$\times$ Uni<br>$\times$ Female | Sub-sub-field<br>$\times$ Uni | Sub-sub-field<br>$\times$ Uni<br>$\times$ Female |
| Mean Dep. Var             | 9.684                     | 9.688                                        | 9.661                         | 9.665                                            |
| $N$                       | 170082                    | 170082                                       | 170082                        | 170082                                           |

Robust standard errors in parentheses. \*  $p < 0.10$ , \*\*  $p < 0.05$ , \*\*\*  $p < 0.01$

Table A22: Dependent Variable: Predicted Employment Rate

|                           | (1)                       | (2)                                          | (3)                           | (4)                                              |
|---------------------------|---------------------------|----------------------------------------------|-------------------------------|--------------------------------------------------|
| Female                    | -0.0117***<br>(0.000853)  | -0.0113***<br>(0.000986)                     | -0.0144***<br>(0.000997)      | -0.0137***<br>(0.00116)                          |
| Female $\times$ Post 2009 | -0.00408***<br>(0.00109)  | -0.00242**<br>(0.00117)                      | -0.00835***<br>(0.00182)      | -0.00583***<br>(0.00189)                         |
| Female $\times$ Post 2007 | 0.00143<br>(0.00105)      | 0.00277**<br>(0.00122)                       | -0.000702<br>(0.00139)        | 0.000686<br>(0.00158)                            |
| Year FE                   | ✓                         | ✓                                            | ✓                             | ✓                                                |
| Main Predictor            | Sub-field<br>$\times$ Uni | Sub-field<br>$\times$ Uni<br>$\times$ Female | Sub-sub-field<br>$\times$ Uni | Sub-sub-field<br>$\times$ Uni<br>$\times$ Female |
| Mean Dep. Var             | 0.873                     | 0.872                                        | 0.874                         | 0.872                                            |
| $N$                       | 170082                    | 170082                                       | 170082                        | 170082                                           |

Robust standard errors in parentheses. \*  $p < 0.10$ , \*\*  $p < 0.05$ , \*\*\*  $p < 0.01$

## Appendix C: exam structure

Table A23: Exam Structure Comparison, sample of subjects

| Subject                 | 2009 (pre-reform)                                                                                                                                                          | 2010 (post-reform)                                                                                                                                                       |
|-------------------------|----------------------------------------------------------------------------------------------------------------------------------------------------------------------------|--------------------------------------------------------------------------------------------------------------------------------------------------------------------------|
| <b>Catalan</b>          | Can choose between two exam models with same structure<br>Part 1: reading. 4 OE questions<br>Part 2: writing. 1 OE question<br>Part 3: reflection on language. 4 OE, 1 MCQ | Can choose between two exam models with same structure<br>Part 1: reading. 4 OE, 2 MCQ<br>Part 2: writing. 3 OE questions<br>Part 3: reflection on language. 2 OE, 2 MCQ |
| <b>Economics</b>        | Can choose between two options with same structure<br>6 OE questions                                                                                                       | Can choose between two options with same structure<br>6 OE questions                                                                                                     |
| <b>English</b>          | Part 1: reading. 1 page text + 8 MCQs<br>Part 2: writing. Choose between 2 topics (100 words)<br>Part 3: listening. 8 MCQs                                                 | Part 1: reading. 1 page text + 8 MCQs<br>Part 2: writing. Choose between 2 topics (100 words)<br>Part 3: listening. 8 MCQs                                               |
| <b>History</b>          | Can choose between two options with same structure<br>For each option: text + 5 OE and infographic + 5 OE                                                                  | Can choose between two options with same structure<br>For each option: text + 5 OE and infographic + 5 OE                                                                |
| <b>Industrial Tech.</b> | Can choose between two options with same structure<br>5 MCQs + 3 OE exercises                                                                                              | Can choose between two options with same structure<br>5 MCQs + 3 OE exercises                                                                                            |
| <b>Latin</b>            | Can choose between two options with same structure<br>3 OE, 1 MCQ                                                                                                          | Can choose between two options with same structure<br>3 OE, 1 MCQ                                                                                                        |
| <b>Mathematics</b>      | 6 OE questions<br>Must answer 3 out of 4 questions (2 points each), 1 out of 2 questions (4 points each))                                                                  | 6 OE questions<br>(Must answer 5 out of 6 questions (2 points each))                                                                                                     |
| <b>Philosophy</b>       | Can choose between two options with same structure<br>For each option: text + 5 OE                                                                                         | Can choose between two options with same structure<br>or each option: text + 5 OE                                                                                        |
| <b>Physics</b>          | Can choose between two options with same structure<br>For each option: 6 OE questions                                                                                      | Can choose between two options with same structure<br>For each option: 5 OE questions                                                                                    |
| <b>Spanish</b>          | Can choose between two options with same structure<br>Part 1: reading. 5 OE, 1 MCQ<br>Part 2: writing. 1 OE question<br>Part 3: reflection on language. 3 OE, 2 MCQ        | Can choose between two options with same structure<br>Part 1: reading. 4 OE, 2 MCQs<br>Part 2: writing. 3 OE questions<br>Part 3: reflection on language. 2 OE, 2 MCQ    |

Note: OE = open-ended question; MCQ = multiple choice question.

Source: <https://www.selecat.cat/>
